# Supplementary material for: Alkylresorcinols as a New Type of Gut Microbiota Regulators Influencing Immune Therapy Efficiency in Lung Cancer Treatment
Source: Hindawi journal article supplement (doi:10.1155/2023/2333767), 2023-12-23
Supplement: f1 [file 2333767.f1.zip]

Archive with 2 entries (2 files):
- Supplementary Table 1.docx
- Supplementary Table 2.docx
