# Supplementary material for: Alkylresorcinols as a New Type of Gut Microbiota Regulators Influencing Immune Therapy Efficiency in Lung Cancer Treatment
Source: Hindawi journal article supplement (doi:10.1155/2023/2333767), 2023-12-23
Supplement: f1 [file 2333767.f1.zip › Supplementary Table 1.docx]

| Tаблица 1 | | | | | | | | | | | | | |
| --- | --- | --- | --- | --- | --- | --- | --- | --- | --- | --- | --- | --- | --- |
| **Resorcinol** | | | | | | | | | | | | | |
|  |  | **Blood** | **Feces** | **Blood** | **Feces** | **Blood** | **Feces** | **Blood** | **Feces** | **Blood** | **Feces** | **Blood** | **Feces** |
|  |  | Positive_before | | Positive_after | | Non-negative before | | Non-negative after | | Negative before | | Negative after | |
| **feces_HIAA_lung_cancer** | **Correlation Coefficient** | 0,714 | 0,771 | 0,6 | -0,2 | 0,234 | 0,485 | 0,467 | -0,321 | -0,717 | -0,133 | -0,262 | 0,429 |
| **Significance Level P** | 0,1108 | 0,0724 | 0,208 | 0,704 | 0,544 | 0,1854 | 0,1739 | 0,3655 | 0,0298 | 0,7324 | 0,5309 | 0,2894 |
| **n** | 6 | 6 | 6 | 6 | 9 | 9 | 10 | 10 | 9 | 9 | 8 | 8 |
| **feces_Indol_lung_cancer** | **Correlation Coefficient** | 0,086 | 0,086 | 0,6 | 0,486 | 0,533 | 0,35 | 0,467 | 0,539 | 0,167 | 0,683 | -0,357 | 0,238 |
| **Significance Level P** | 0,8717 | 0,8717 | 0,208 | 0,3287 | 0,1392 | 0,3558 | 0,1739 | 0,1076 | 0,6682 | 0,0424 | 0,3851 | 0,5702 |
| **n** | 6 | 6 | 6 | 6 | 9 | 9 | 10 | 10 | 9 | 9 | 8 | 8 |
| **feces_Indole-3-butyric_lung_cancer** | **Correlation Coefficient** | 0,486 | -0,029 | 0,6 | 0,429 | 0,567 | 0,117 | 0,394 | 0,6 | 0,733 | 0,067 | -0,452 | 0,095 |
| **Significance Level P** | 0,3287 | 0,9572 | 0,208 | 0,3965 | 0,1116 | 0,765 | 0,26 | 0,0667 | 0,0246 | 0,8647 | 0,2604 | 0,8225 |
| **n** | 6 | 6 | 6 | 6 | 9 | 9 | 10 | 10 | 9 | 9 | 8 | 8 |
| **feces_Indole-3-carboxaldehyde_lung_cancer** | **Correlation Coefficient** | 0,086 | -0,371 | 0,771 | 0,371 | 0,017 | 0,083 | 0,612 | 0,067 | 0,367 | -0,283 | 0,19 | -0,333 |
| **Significance Level P** | 0,8717 | 0,4685 | 0,0724 | 0,4685 | 0,9661 | 0,8312 | 0,06 | 0,8548 | 0,3317 | 0,46 | 0,6514 | 0,4198 |
| **n** | 6 | 6 | 6 | 6 | 9 | 9 | 10 | 10 | 9 | 9 | 8 | 8 |
| **feces_Indole-3-propionic_lung_cancer** | **Correlation Coefficient** | 0,657 | 0,771 | 0,714 | 0,2 | 0,733 | 0,467 | 0,527 | 0,03 | -0,583 | 0,033 | -0,548 | 0,286 |
| **Significance Level P** | 0,1562 | 0,0724 | 0,1108 | 0,704 | 0,0246 | 0,2054 | 0,1173 | 0,9338 | 0,0992 | 0,9322 | 0,16 | 0,4927 |
| **n** | 6 | 6 | 6 | 6 | 9 | 9 | 10 | 10 | 9 | 9 | 8 | 8 |
| **feces_Resorcinol_lung_cancer** | **Correlation Coefficient** | 0,771 |  | 0,543 |  | 0,733 |  | 0,442 |  | 0,15 |  | -0,643 |  |
| **Significance Level P** | 0,0724 | 0,2657 | 0,0246 | 0,2004 | 0,7001 | 0,0856 |
| **n** | 6 | 6 | 9 | 10 | 9 | 8 |
| **feces_Tryptamin_lung_cancer** | **Correlation Coefficient** | 0,886 | 0,943 | 0,029 | -0,029 | 0,367 | 0,683 | 0,2 | 0,467 | -0,233 | 0,4 | -0,262 | -0,024 |
| **Significance Level P** | 0,0188 | 0,0048 | 0,9572 | 0,9572 | 0,3317 | 0,0424 | 0,5796 | 0,1739 | 0,5457 | 0,2861 | 0,5309 | 0,9554 |
| **n** | 6 | 6 | 6 | 6 | 9 | 9 | 10 | 10 | 9 | 9 | 8 | 8 |
| **feces_Xanturenic acid_lung_cancer** | **Correlation Coefficient** | 0,086 | 0,314 | 0,257 | -0,029 | 0,117 | 0 | 0,576 | 0,418 | -0,033 | 0,05 | 0,762 | -0,738 |
| **Significance Level P** | 0,8717 | 0,5441 | 0,6228 | 0,9572 | 0,765 | 1 | 0,0816 | 0,2291 | 0,9322 | 0,8984 | 0,028 | 0,0366 |
| **n** | 6 | 6 | 6 | 6 | 9 | 9 | 10 | 10 | 9 | 9 | 8 | 8 |
|  | **Methylresorcinol** | | | | | | | | | | | | |
| **feces_Antranillic_lung_cancer** | **Correlation Coefficient** | -0,429 | 0,6 | 0,29 | -0,371 | -0,335 | 0,669 | 0,164 | -0,115 | -0,4 | 0,35 | 0,167 | 0,262 |
| **Significance Level P** | 0,3965 | 0,208 | 0,5774 | 0,4685 | 0,3786 | 0,0486 | 0,6505 | 0,7514 | 0,2861 | 0,3558 | 0,6932 | 0,5309 |
| **n** | 6 | 6 | 6 | 6 | 9 | 9 | 10 | 10 | 9 | 9 | 8 | 8 |
| **feces_HIAA_lung_cancer** | **Correlation Coefficient** | 0,714 | -0,543 | 0,928 | 0,086 | 0,552 | -0,644 | 0,571 | -0,115 | -0,417 | 0,433 | -0,286 | 0 |
| **Significance Level P** | 0,1108 | 0,2657 | 0,0077 | 0,8717 | 0,1231 | 0,061 | 0,0844 | 0,7514 | 0,2646 | 0,244 | 0,4927 | 1 |
| **n** | 6 | 6 | 6 | 6 | 9 | 9 | 10 | 10 | 9 | 9 | 8 | 8 |
| **feces_Indol_lung_cancer** | **Correlation Coefficient** | -0,486 | 0,829 | -0,058 | -0,257 | 0,067 | 0,6 | 0 | -0,127 | -0,083 | 0,85 | 0,452 | 0,81 |
| **Significance Level P** | 0,3287 | 0,0416 | 0,9131 | 0,6228 | 0,8647 | 0,0876 | 1 | 0,7261 | 0,8312 | 0,0037 | 0,2604 | 0,0149 |
| **n** | 6 | 6 | 6 | 6 | 9 | 9 | 10 | 10 | 9 | 9 | 8 | 8 |
| **feces_Indole-3-acetic_lung_cancer** | **Correlation Coefficient** | -0,086 | 0,314 | 0,435 | -0,371 | 0,033 | -0,1 | 0,188 | -0,067 | -0,7 | 0,2 | -0,405 | -0,119 |
| **Significance Level P** | 0,8717 | 0,5441 | 0,3889 | 0,4685 | 0,9322 | 0,798 | 0,6021 | 0,8548 | 0,0358 | 0,6059 | 0,3199 | 0,7789 |
| **n** | 6 | 6 | 6 | 6 | 9 | 9 | 10 | 10 | 9 | 9 | 8 | 8 |
| **feces_Indole-3-acrylic_lung_cancer** | **Correlation Coefficient** | -0,143 | -0,543 | -0,116 | -0,829 | -0,2 | 0,25 | 0,316 | -0,333 | -0,017 | 0,417 | 0,286 | 0,143 |
| **Significance Level P** | 0,7872 | 0,2657 | 0,8268 | 0,0416 | 0,6059 | 0,5165 | 0,3736 | 0,3466 | 0,9661 | 0,2646 | 0,4927 | 0,7358 |
| **n** | 6 | 6 | 6 | 6 | 9 | 9 | 10 | 10 | 9 | 9 | 8 | 8 |
| **feces_Indole-3-carboxaldehyde_lung_cancer** | **Correlation Coefficient** | -0,029 | -0,086 | 0,203 | -0,6 | -0,167 | 0,15 | -0,012 | -0,648 | -0,7 | 0,2 | 0,024 | -0,119 |
| **Significance Level P** | 0,9572 | 0,8717 | 0,6998 | 0,208 | 0,6682 | 0,7001 | 0,9734 | 0,0425 | 0,0358 | 0,6059 | 0,9554 | 0,7789 |
| **n** | 6 | 6 | 6 | 6 | 9 | 9 | 10 | 10 | 9 | 9 | 8 | 8 |
| **feces_Indole-3-lactic_lung_cancer** | **Correlation Coefficient** | -0,257 | -0,429 | -0,406 | -0,6 | -0,183 | -0,7 | -0,085 | -0,612 | -0,333 | 0,433 | -0,238 | -0,405 |
| **Significance Level P** | 0,6228 | 0,3965 | 0,4247 | 0,208 | 0,6368 | 0,0358 | 0,8152 | 0,06 | 0,3807 | 0,244 | 0,5702 | 0,3199 |
| **n** | 6 | 6 | 6 | 6 | 9 | 9 | 10 | 10 | 9 | 9 | 8 | 8 |
| **feces_Indole-3-propionic_lung_cancer** | **Correlation Coefficient** | 0,314 | -0,314 | 0,638 | -0,143 | 0,567 | -0,067 | 0,243 | -0,382 | -0,433 | 0,65 | 0,048 | 0,667 |
| **Significance Level P** | 0,5441 | 0,5441 | 0,1731 | 0,7872 | 0,1116 | 0,8647 | 0,4984 | 0,2763 | 0,244 | 0,0581 | 0,9108 | 0,071 |
| **n** | 6 | 6 | 6 | 6 | 9 | 9 | 10 | 10 | 9 | 9 | 8 | 8 |
| **feces_Kynurenic acid_lung_cancer** | **Correlation Coefficient** | 0,543 | -0,771 | 0,232 | -0,486 | 0,6 | -0,317 | 0,413 | -0,127 | -0,133 | 0,2 | 0,333 | -0,286 |
| **Significance Level P** | 0,2657 | 0,0724 | 0,6584 | 0,3287 | 0,0876 | 0,4064 | 0,2351 | 0,7261 | 0,7324 | 0,6059 | 0,4198 | 0,4927 |
| **n** | 6 | 6 | 6 | 6 | 9 | 9 | 10 | 10 | 9 | 9 | 8 | 8 |
| **feces_Quinolinic_lung_cancer** | **Correlation Coefficient** | 0,829 | -0,657 | 0,435 | -0,371 | 0,467 | -0,367 | 0,486 | 0,103 | -0,2 | 0,483 | 0,667 | 0,238 |
| **Significance Level P** | 0,0416 | 0,1562 | 0,3889 | 0,4685 | 0,2054 | 0,3317 | 0,1541 | 0,777 | 0,6059 | 0,1875 | 0,071 | 0,5702 |
| **n** | 6 | 6 | 6 | 6 | 9 | 9 | 10 | 10 | 9 | 9 | 8 | 8 |
| **feces_Tryptophan_lung_cancer** | **Correlation Coefficient** | 0,429 | -0,657 | 0,522 | -0,257 | 0,617 | -0,483 | 0,085 | -0,515 | -0,017 | 0,817 | 0 | 0,357 |
| **Significance Level P** | 0,3965 | 0,1562 | 0,2883 | 0,6228 | 0,0769 | 0,1875 | 0,8152 | 0,1276 | 0,9661 | 0,0072 | 1 | 0,3851 |
| **n** | 6 | 6 | 6 | 6 | 9 | 9 | 10 | 10 | 9 | 9 | 8 | 8 |
| **feces_Xanturenic acid_lung_cancer** | **Correlation Coefficient** | 0,543 | -0,771 | 0,232 | -0,486 | 0,267 | -0,233 | 0,316 | -0,164 | -0,667 | -0,033 | 0,381 | -0,333 |
| **Significance Level P** | 0,2657 | 0,0724 | 0,6584 | 0,3287 | 0,4879 | 0,5457 | 0,3736 | 0,6515 | 0,0499 | 0,9322 | 0,3518 | 0,4198 |
| **n** | 6 | 6 | 6 | 6 | 9 | 9 | 10 | 10 | 9 | 9 | 8 | 8 |
|  | **Ethylresorcinol** | | | | | | | | | | | | |
| **feces_Indol_lung_cancer** | **Correlation Coefficient** | 0,086 | -0,371 | -0,429 | 0,771 | 0,117 | -0,633 | -0,527 | 0,806 | 0,133 | -0,233 | -0,762 | -0,429 |
| **Significance Level P** | 0,8717 | 0,4685 | 0,3965 | 0,0724 | 0,765 | 0,0671 | 0,1173 | 0,0049 | 0,7324 | 0,5457 | 0,028 | 0,2894 |
| **n** | 6 | 6 | 6 | 6 | 9 | 9 | 10 | 10 | 9 | 9 | 8 | 8 |
| **feces_Indole-3-acetic_lung_cancer** | **Correlation Coefficient** | 0,257 | -0,257 | -0,257 | -0,771 | 0,283 | -0,533 | -0,067 | -0,164 | -0,3 | 0,75 | -0,19 | 0,167 |
| **Significance Level P** | 0,6228 | 0,6228 | 0,6228 | 0,0724 | 0,46 | 0,1392 | 0,8548 | 0,6515 | 0,4328 | 0,0199 | 0,6514 | 0,6932 |
| **n** | 6 | 6 | 6 | 6 | 9 | 9 | 10 | 10 | 9 | 9 | 8 | 8 |
| **feces_Indole-3-acrylic_lung_cancer** | **Correlation Coefficient** | 0,771 | -0,371 | -0,2 | -0,143 | 0,25 | 0,067 | 0,079 | -0,067 | -0,6 | -0,3 | -0,357 | -0,167 |
| **Significance Level P** | 0,0724 | 0,4685 | 0,704 | 0,7872 | 0,5165 | 0,8647 | 0,8287 | 0,8548 | 0,0876 | 0,4328 | 0,3851 | 0,6932 |
| **n** | 6 | 6 | 6 | 6 | 9 | 9 | 10 | 10 | 9 | 9 | 8 | 8 |
| **feces_Indole-3-butyric_lung_cancer** | **Correlation Coefficient** | -0,371 | 0,771 | -0,486 | 0,486 | -0,383 | 0,483 | -0,261 | 0,673 | 0,4 | -0,683 | 0,095 | 0,238 |
| **Significance Level P** | 0,4685 | 0,0724 | 0,3287 | 0,3287 | 0,3085 | 0,1875 | 0,4671 | 0,033 | 0,2861 | 0,0424 | 0,8225 | 0,5702 |
| **n** | 6 | 6 | 6 | 6 | 9 | 9 | 10 | 10 | 9 | 9 | 8 | 8 |
| **feces_Indole-3-lactic_lung_cancer** | **Correlation Coefficient** | 0,657 | -0,429 | -0,429 | -0,371 | 0,483 | -0,3 | -0,212 | -0,236 | -0,667 | 0,083 | 0,214 | 0,048 |
| **Significance Level P** | 0,1562 | 0,3965 | 0,3965 | 0,4685 | 0,1875 | 0,4328 | 0,5563 | 0,5109 | 0,0499 | 0,8312 | 0,6103 | 0,9108 |
| **n** | 6 | 6 | 6 | 6 | 9 | 9 | 10 | 10 | 9 | 9 | 8 | 8 |
| **feces_Kynurenic acid_lung_cancer** | **Correlation Coefficient** | 0,314 | -0,543 | 0,029 | -0,6 | 0,35 | -0,683 | 0,079 | 0,091 | -0,467 | 0,45 | 0,286 | -0,429 |
| **Significance Level P** | 0,5441 | 0,2657 | 0,9572 | 0,208 | 0,3558 | 0,0424 | 0,8287 | 0,8028 | 0,2054 | 0,2242 | 0,4927 | 0,2894 |
| **n** | 6 | 6 | 6 | 6 | 9 | 9 | 10 | 10 | 9 | 9 | 8 | 8 |
| **feces_Kynurenine_lung_cancer** | **Correlation Coefficient** | 0,543 | -0,886 | 0,6 | -0,486 | 0,3 | -0,833 | -0,018 | 0,03 | 0,45 | -0,117 | 0,19 | -0,333 |
| **Significance Level P** | 0,2657 | 0,0188 | 0,208 | 0,3287 | 0,4328 | 0,0053 | 0,9602 | 0,9338 | 0,2242 | 0,765 | 0,6514 | 0,4198 |
| **n** | 6 | 6 | 6 | 6 | 9 | 9 | 10 | 10 | 9 | 9 | 8 | 8 |
| **feces_Quinolinic_lung_cancer** | **Correlation Coefficient** | -0,257 | -0,143 | -0,257 | -0,771 | -0,4 | -0,117 | 0,248 | -0,515 | -0,567 | -0,2 | 0,048 | -0,476 |
| **Significance Level P** | 0,6228 | 0,7872 | 0,6228 | 0,0724 | 0,2861 | 0,765 | 0,4888 | 0,1276 | 0,1116 | 0,6059 | 0,9108 | 0,2329 |
| **n** | 6 | 6 | 6 | 6 | 9 | 9 | 10 | 10 | 9 | 9 | 8 | 8 |
| **feces_Tryptamin_lung_cancer** | **Correlation Coefficient** | -0,429 | -0,429 | 0,086 | 0,6 | -0,467 | 0,017 | -0,018 | 0,6 | 0,183 | 0,433 | -0,714 | -0,405 |
| **Significance Level P** | 0,3965 | 0,3965 | 0,8717 | 0,208 | 0,2054 | 0,9661 | 0,9602 | 0,0667 | 0,6368 | 0,244 | 0,0465 | 0,3199 |
| **n** | 6 | 6 | 6 | 6 | 9 | 9 | 10 | 10 | 9 | 9 | 8 | 8 |
| **feces_Tryptophan_lung_cancer** | **Correlation Coefficient** | -0,257 | 0,6 | -0,086 | -0,714 | 0,2 | 0 | -0,358 | -0,152 | -0,583 | -0,167 | -0,69 | -0,381 |
| **Significance Level P** | 0,6228 | 0,208 | 0,8717 | 0,1108 | 0,6059 | 1 | 0,3104 | 0,6761 | 0,0992 | 0,6682 | 0,058 | 0,3518 |
| **n** | 6 | 6 | 6 | 6 | 9 | 9 | 10 | 10 | 9 | 9 | 8 | 8 |
|  | **Propylresorcinol** | | | | | | | | | | | | |
| **feces_Antranillic_lung_cancer** | **Correlation Coefficient** | -0,086 | -0,771 | -0,371 | -0,829 | -0,1 | -0,176 | -0,212 | -0,442 | -0,644 | 0,367 | -0,738 | 0,048 |
| **Significance Level P** | 0,8717 | 0,0724 | 0,4685 | 0,0416 | 0,7971 | 0,6511 | 0,5563 | 0,2004 | 0,061 | 0,3317 | 0,0366 | 0,9108 |
| **n** | 6 | 6 | 6 | 6 | 9 | 9 | 10 | 10 | 9 | 9 | 8 | 8 |
| **feces_Indol_lung_cancer** | **Correlation Coefficient** | -0,143 | -0,314 | -0,429 | 0,029 | -0,2 | -0,017 | -0,006 | 0,03 | -0,753 | 0,45 | -0,452 | -0,238 |
| **Significance Level P** | 0,7872 | 0,5441 | 0,3965 | 0,9572 | 0,6059 | 0,9661 | 0,9867 | 0,9338 | 0,0191 | 0,2242 | 0,2604 | 0,5702 |
| **n** | 6 | 6 | 6 | 6 | 9 | 9 | 10 | 10 | 9 | 9 | 8 | 8 |
| **feces_Indole-3-acetic_lung_cancer** | **Correlation Coefficient** | -0,6 | -0,371 | 0,086 | -0,257 | -0,567 | -0,617 | -0,006 | -0,358 | -0,519 | -0,333 | -0,095 | -0,524 |
| **Significance Level P** | 0,208 | 0,4685 | 0,8717 | 0,6228 | 0,1116 | 0,0769 | 0,9867 | 0,3104 | 0,1524 | 0,3807 | 0,8225 | 0,1827 |
| **n** | 6 | 6 | 6 | 6 | 9 | 9 | 10 | 10 | 9 | 9 | 8 | 8 |
| **feces_Indole-3-butyric_lung_cancer** | **Correlation Coefficient** | 0,771 | -0,086 | -0,6 | 0,029 | 0,583 | 0,15 | -0,273 | 0,067 | 0,385 | -0,1 | -0,119 | 0,214 |
| **Significance Level P** | 0,0724 | 0,8717 | 0,208 | 0,9572 | 0,0992 | 0,7001 | 0,4458 | 0,8548 | 0,3063 | 0,798 | 0,7789 | 0,6103 |
| **n** | 6 | 6 | 6 | 6 | 9 | 9 | 10 | 10 | 9 | 9 | 8 | 8 |
| **feces_Indole-3-propionic_lung_cancer** | **Correlation Coefficient** | -0,029 | -0,886 | 0,086 | -0,143 | -0,217 | -0,333 | 0,224 | -0,479 | -0,753 | 0,133 | -0,357 | 0,071 |
| **Significance Level P** | 0,9572 | 0,0188 | 0,8717 | 0,7872 | 0,5755 | 0,3807 | 0,5334 | 0,1615 | 0,0191 | 0,7324 | 0,3851 | 0,8665 |
| **n** | 6 | 6 | 6 | 6 | 9 | 9 | 10 | 10 | 9 | 9 | 8 | 8 |
| **feces_Kynurenine_lung_cancer** | **Correlation Coefficient** | -0,314 | -0,714 | 0,029 | -0,6 | -0,417 | -0,4 | 0,055 | -0,733 | -0,268 | 0,45 | 0,119 | 0,19 |
| **Significance Level P** | 0,5441 | 0,1108 | 0,9572 | 0,208 | 0,2646 | 0,2861 | 0,881 | 0,0158 | 0,486 | 0,2242 | 0,7789 | 0,6514 |
| **n** | 6 | 6 | 6 | 6 | 9 | 9 | 10 | 10 | 9 | 9 | 8 | 8 |
| **feces_Methylresorcinol_lung_cancer** | **Correlation Coefficient** | 0,371 | -0,143 | 0,886 | 0,143 | 0,367 | 0,367 | 0,588 | 0,467 | -0,787 | 0,217 | -0,667 | 0,167 |
| **Significance Level P** | 0,4685 | 0,7872 | 0,0188 | 0,7872 | 0,3317 | 0,3317 | 0,0739 | 0,1739 | 0,0119 | 0,5755 | 0,071 | 0,6932 |
| **n** | 6 | 6 | 6 | 6 | 9 | 9 | 10 | 10 | 9 | 9 | 8 | 8 |
| **feces_Pentadecylresorcinol_lung_cancer** | **Correlation Coefficient** | -0,2 | 0,714 | -0,2 | 0,6 | 0,083 | 0,733 | -0,176 | 0,588 | -0,703 | 0,15 | -0,611 | 0,575 |
| **Significance Level P** | 0,704 | 0,1108 | 0,704 | 0,208 | 0,8312 | 0,0246 | 0,6272 | 0,0739 | 0,0347 | 0,7001 | 0,1077 | 0,1361 |
| **n** | 6 | 6 | 6 | 6 | 9 | 9 | 10 | 10 | 9 | 9 | 8 | 8 |
| **feces_Pentylresorcinol_lung_cancer** | **Correlation Coefficient** | 0,794 | 0,088 | 0,086 | 0,771 | 0,294 | 0,286 | 0,358 | 0,624 | -0,695 | 0 | 0,228 | 0,18 |
| **Significance Level P** | 0,059 | 0,8679 | 0,8717 | 0,0724 | 0,4423 | 0,4561 | 0,3104 | 0,0537 | 0,0379 | 1 | 0,5878 | 0,6703 |
| **n** | 6 | 6 | 6 | 6 | 9 | 9 | 10 | 10 | 9 | 9 | 8 | 8 |
| **feces_Resorcinol_lung_cancer** | **Correlation Coefficient** | 0,086 | -0,771 | 0,086 | 0,771 | 0,117 | -0,067 | 0,2 | 0,709 | -0,351 | 0,8 | -0,071 | 0,595 |
| **Significance Level P** | 0,8717 | 0,0724 | 0,8717 | 0,0724 | 0,765 | 0,8647 | 0,5796 | 0,0217 | 0,3537 | 0,0096 | 0,8665 | 0,1195 |
| **n** | 6 | 6 | 6 | 6 | 9 | 9 | 10 | 10 | 9 | 9 | 8 | 8 |
| **feces_Tryptamin_lung_cancer** | **Correlation Coefficient** | 0,257 | -0,829 | -0,943 | -0,086 | 0,483 | -0,067 | -0,479 | 0,018 | -0,678 | 0,433 | -0,31 | -0,333 |
| **Significance Level P** | 0,6228 | 0,0416 | 0,0048 | 0,8717 | 0,1875 | 0,8647 | 0,1615 | 0,9602 | 0,0448 | 0,244 | 0,4556 | 0,4198 |
| **n** | 6 | 6 | 6 | 6 | 9 | 9 | 10 | 10 | 9 | 9 | 8 | 8 |
|  | **Penthylresorcinol** | | | | | | | | | | | | |
| **feces_Antranillic_lung_cancer** | **Correlation Coefficient** | -0,086 | 0,088 | 0,29 | -0,486 | 0,092 | 0,219 | -0,116 | -0,442 | 0,824 | 0,633 | 0,071 | 0,168 |
| **Significance Level P** | 0,8717 | 0,8679 | 0,5774 | 0,3287 | 0,8138 | 0,5706 | 0,7499 | 0,2004 | 0,0064 | 0,0671 | 0,8665 | 0,6915 |
| **n** | 6 | 6 | 6 | 6 | 9 | 9 | 10 | 10 | 9 | 9 | 8 | 8 |
| **feces_Hexylresorcinol_lung_cancer** | **Correlation Coefficient** | 0,314 | -0,265 | 0,377 | 0,943 | 0,333 | 0,109 | 0,073 | 0,503 | 0,605 | 0,767 | 0,262 | 0,299 |
| **Significance Level P** | 0,5441 | 0,6121 | 0,4615 | 0,0048 | 0,3807 | 0,7796 | 0,8408 | 0,1383 | 0,0843 | 0,0159 | 0,5309 | 0,4713 |
| **n** | 6 | 6 | 6 | 6 | 9 | 9 | 10 | 10 | 9 | 9 | 8 | 8 |
| **feces_Indole-3-acrylic_lung_cancer** | **Correlation Coefficient** | -0,2 | -0,353 | 0,812 | 0,2 | 0,183 | 0,034 | 0,152 | 0,382 | -0,387 | 0,25 | -0,238 | 0,263 |
| **Significance Level P** | 0,704 | 0,4924 | 0,0499 | 0,704 | 0,6368 | 0,9316 | 0,6742 | 0,2763 | 0,3041 | 0,5165 | 0,5702 | 0,5284 |
| **n** | 6 | 6 | 6 | 6 | 9 | 9 | 10 | 10 | 9 | 9 | 8 | 8 |
| **feces_Indole-3-butyric_lung_cancer** | **Correlation Coefficient** | -0,486 | 0,353 | 0,928 | 0,429 | -0,2 | 0,336 | 0,274 | 0,188 | 0,017 | -0,133 | 0,071 | 0,755 |
| **Significance Level P** | 0,3287 | 0,4924 | 0,0077 | 0,3965 | 0,6059 | 0,3765 | 0,4429 | 0,6032 | 0,9658 | 0,7324 | 0,8665 | 0,0305 |
| **n** | 6 | 6 | 6 | 6 | 9 | 9 | 10 | 10 | 9 | 9 | 8 | 8 |
| **feces_Indole-3-carboxaldehyde_lung_cancer** | **Correlation Coefficient** | 0,371 | -0,53 | 0,986 | 0,371 | 0,433 | -0,042 | 0,579 | 0,2 | 0,672 | 0,633 | -0,071 | 0,156 |
| **Significance Level P** | 0,4685 | 0,2798 | 0,0003 | 0,4685 | 0,244 | 0,9145 | 0,0793 | 0,5796 | 0,0473 | 0,0671 | 0,8665 | 0,7128 |
| **n** | 6 | 6 | 6 | 6 | 9 | 9 | 10 | 10 | 9 | 9 | 8 | 8 |
| **feces_Kynurenic acid_lung_cancer** | **Correlation Coefficient** | 0,257 | -0,883 | 0,406 | -0,029 | -0,3 | 0,16 | 0,055 | -0,018 | -0,042 | 0,067 | -0,31 | -0,778 |
| **Significance Level P** | 0,6228 | 0,0198 | 0,4247 | 0,9572 | 0,4328 | 0,6816 | 0,8803 | 0,9602 | 0,9145 | 0,8647 | 0,4556 | 0,0229 |
| **n** | 6 | 6 | 6 | 6 | 9 | 9 | 10 | 10 | 9 | 9 | 8 | 8 |
| **feces_Pentylresorcinol_lung_cancer** | **Correlation Coefficient** | -0,618 |  | 0,493 |  | -0,471 |  | 0,061 |  | 0,622 |  | 0,371 |  |
| **Significance Level P** | 0,1911 | 0,3206 | 0,2011 | 0,8671 | 0,0738 | 0,3652 |
| **n** | 6 | 6 | 9 | 10 | 9 | 8 |
| **feces_Propylresorcinol_lung_cancer** | **Correlation Coefficient** | 0,429 | 0,088 | 0,058 | 0,771 | 0,467 | 0,286 | -0,463 | 0,624 | 0,025 | 0 | -0,619 | 0,18 |
| **Significance Level P** | 0,3965 | 0,8679 | 0,9131 | 0,0724 | 0,2054 | 0,4561 | 0,1774 | 0,0537 | 0,9487 | 1 | 0,1017 | 0,6703 |
| **n** | 6 | 6 | 6 | 6 | 9 | 9 | 10 | 10 | 9 | 9 | 8 | 8 |
| **feces_Quinolinic_lung_cancer** | **Correlation Coefficient** | 0,143 | -0,794 | 0,377 | -0,143 | 0,3 | -0,395 | -0,238 | 0,2 | -0,437 | 0,15 | -0,69 | -0,06 |
| **Significance Level P** | 0,7872 | 0,059 | 0,4615 | 0,7872 | 0,4328 | 0,2928 | 0,5082 | 0,5796 | 0,2395 | 0,7001 | 0,058 | 0,888 |
| **n** | 6 | 6 | 6 | 6 | 9 | 9 | 10 | 10 | 9 | 9 | 8 | 8 |
| **feces_Resorcinol_lung_cancer** | **Correlation Coefficient** | -0,543 | 0 | 0,493 | 1 | -0,283 | 0,462 | -0,28 | 0,588 | 0,16 | 0,367 | -0,429 | 0,216 |
| **Significance Level P** | 0,2657 | 1 | 0,3206 | 1 | 0,46 | 0,2103 | 0,4325 | 0,0739 | 0,6816 | 0,3317 | 0,2894 | 0,6081 |
| **n** | 6 | 6 | 6 | 6 | 9 | 9 | 10 | 10 | 9 | 9 | 8 | 8 |
| **feces_Tryptophan_lung_cancer** | **Correlation Coefficient** | -0,086 | -0,177 | 0,319 | -0,086 | -0,517 | 0,134 | 0,268 | 0,079 | 0,126 | 0,717 | 0 | -0,204 |
| **Significance Level P** | 0,8717 | 0,7379 | 0,5379 | 0,8717 | 0,1544 | 0,7302 | 0,4536 | 0,8287 | 0,7466 | 0,0298 | 1 | 0,6287 |
| **n** | 6 | 6 | 6 | 6 | 9 | 9 | 10 | 10 | 9 | 9 | 8 | 8 |
| **feces_Xanturenic acid_lung_cancer** | **Correlation Coefficient** | 0,257 | -0,883 | 0,406 | -0,029 | 0,267 | -0,563 | -0,128 | 0,358 | 0,521 | 0,233 | 0,024 | -0,587 |
| **Significance Level P** | 0,6228 | 0,0198 | 0,4247 | 0,9572 | 0,4879 | 0,1145 | 0,7244 | 0,3104 | 0,1503 | 0,5457 | 0,9554 | 0,1262 |
| **n** | 6 | 6 | 6 | 6 | 9 | 9 | 10 | 10 | 9 | 9 | 8 | 8 |
|  | **Hexylresorcinol** | | | | | | | | | | | | |
| **feces_Dodecylresorcinol_lung_cancer** | **Correlation Coefficient** | 0,771 | 0,143 | 0,2 | 0,429 | 0,817 | 0,233 | 0,212 | 0,394 | 0,8 | 0,35 | 0,429 | 0,286 |
| **Significance Level P** | 0,0724 | 0,7872 | 0,704 | 0,3965 | 0,0072 | 0,5457 | 0,5563 | 0,26 | 0,0096 | 0,3558 | 0,2894 | 0,4927 |
| **n** | 6 | 6 | 6 | 6 | 9 | 9 | 10 | 10 | 9 | 9 | 8 | 8 |
| **feces_Indole-3-acetic_lung_cancer** | **Correlation Coefficient** | 0,829 | 0,314 | -0,257 | -0,086 | 0,3 | 0,133 | -0,103 | 0,152 | -0,15 | 0,35 | 0,857 | 0,5 |
| **Significance Level P** | 0,0416 | 0,5441 | 0,6228 | 0,8717 | 0,4328 | 0,7324 | 0,777 | 0,6761 | 0,7001 | 0,3558 | 0,0065 | 0,207 |
| **n** | 6 | 6 | 6 | 6 | 9 | 9 | 10 | 10 | 9 | 9 | 8 | 8 |
| **feces_Indole-3-butyric_lung_cancer** | **Correlation Coefficient** | -0,486 | 0,657 | 0,314 | 0,257 | -0,317 | 0,7 | 0,176 | 0,309 | -0,267 | -0,467 | -0,119 | 0,381 |
| **Significance Level P** | 0,3287 | 0,1562 | 0,5441 | 0,6228 | 0,4064 | 0,0358 | 0,6272 | 0,3848 | 0,4879 | 0,2054 | 0,7789 | 0,3518 |
| **n** | 6 | 6 | 6 | 6 | 9 | 9 | 10 | 10 | 9 | 9 | 8 | 8 |
| **feces_Indole-3-carboxaldehyde_lung_cancer** | **Correlation Coefficient** | 0,6 | 0,829 | 0,314 | 0,257 | 0,45 | 0,817 | -0,152 | -0,127 | 0,083 | 0,6 | -0,476 | -0,81 |
| **Significance Level P** | 0,208 | 0,0416 | 0,5441 | 0,6228 | 0,2242 | 0,0072 | 0,6761 | 0,7261 | 0,8312 | 0,0876 | 0,2329 | 0,0149 |
| **n** | 6 | 6 | 6 | 6 | 9 | 9 | 10 | 10 | 9 | 9 | 8 | 8 |
| **feces_Kynurenine_lung_cancer** | **Correlation Coefficient** | 0,257 | -0,657 | -0,314 | -0,543 | 0,183 | -0,283 | -0,273 | -0,261 | -0,15 | -0,6 | -0,762 | -0,833 |
| **Significance Level P** | 0,6228 | 0,1562 | 0,5441 | 0,2657 | 0,6368 | 0,46 | 0,4458 | 0,4671 | 0,7001 | 0,0876 | 0,028 | 0,0102 |
| **n** | 6 | 6 | 6 | 6 | 9 | 9 | 10 | 10 | 9 | 9 | 8 | 8 |
| **feces_Pentylresorcinol_lung_cancer** | **Correlation Coefficient** | -0,794 | -0,265 | 0,771 | 0,943 | -0,546 | 0,109 | 0,406 | 0,503 | 0,667 | 0,767 | 0,263 | 0,299 |
| **Significance Level P** | 0,059 | 0,6121 | 0,0724 | 0,0048 | 0,1281 | 0,7796 | 0,2443 | 0,1383 | 0,0499 | 0,0159 | 0,5284 | 0,4713 |
| **n** | 6 | 6 | 6 | 6 | 9 | 9 | 10 | 10 | 9 | 9 | 8 | 8 |
| **feces_Quinolinic_lung_cancer** | **Correlation Coefficient** | 0,371 | 0,314 | -0,257 | -0,086 | 0,4 | 0,283 | 0,042 | 0,248 | 0,533 | -0,05 | -0,81 | -0,405 |
| **Significance Level P** | 0,4685 | 0,5441 | 0,6228 | 0,8717 | 0,2861 | 0,46 | 0,9074 | 0,4888 | 0,1392 | 0,8984 | 0,0149 | 0,3199 |
| **n** | 6 | 6 | 6 | 6 | 9 | 9 | 10 | 10 | 9 | 9 | 8 | 8 |
| **feces_Resorcinol_lung_cancer** | **Correlation Coefficient** | -0,257 | -0,486 | 0,771 | 0,943 | -0,267 | -0,017 | 0,442 | 0,758 | 0,6 | 0,25 | 0,31 | 0,214 |
| **Significance Level P** | 0,6228 | 0,3287 | 0,0724 | 0,0048 | 0,4879 | 0,9661 | 0,2004 | 0,0111 | 0,0876 | 0,5165 | 0,4556 | 0,6103 |
| **n** | 6 | 6 | 6 | 6 | 9 | 9 | 10 | 10 | 9 | 9 | 8 | 8 |
|  | **Dodecylresorcinol** | | | | | | | | | | | | |
| **feces_Hexylresorcinol_lung_cancer** | **Correlation Coefficient** | 0,657 | 0,143 | 0,429 | 0,429 | 0,417 | 0,233 | 0,636 | 0,394 | 0,683 | 0,35 | -0,19 | 0,286 |
| **Significance Level P** | 0,1562 | 0,7872 | 0,3965 | 0,3965 | 0,2646 | 0,5457 | 0,0479 | 0,26 | 0,0424 | 0,3558 | 0,6514 | 0,4927 |
| **n** | 6 | 6 | 6 | 6 | 9 | 9 | 10 | 10 | 9 | 9 | 8 | 8 |
| **feces_Indol_lung_cancer** | **Correlation Coefficient** | 0,086 | 0,257 | 0,6 | 0,543 | -0,283 | -0,083 | 0,321 | 0,758 | 0,05 | 0,8 | -0,524 | 0,286 |
| **Significance Level P** | 0,8717 | 0,6228 | 0,208 | 0,2657 | 0,46 | 0,8312 | 0,3655 | 0,0111 | 0,8984 | 0,0096 | 0,1827 | 0,4927 |
| **n** | 6 | 6 | 6 | 6 | 9 | 9 | 10 | 10 | 9 | 9 | 8 | 8 |
| **feces_Indole-3-acetic_lung_cancer** | **Correlation Coefficient** | 0,829 | 0,543 | 0,371 | -0,486 | 0,683 | -0,15 | 0,37 | -0,091 | -0,183 | -0,267 | 0,262 | 0,667 |
| **Significance Level P** | 0,0416 | 0,2657 | 0,4685 | 0,3287 | 0,0424 | 0,7001 | 0,2931 | 0,8028 | 0,6368 | 0,4879 | 0,5309 | 0,071 |
| **n** | 6 | 6 | 6 | 6 | 9 | 9 | 10 | 10 | 9 | 9 | 8 | 8 |
| **feces_Indole-3-acrylic_lung_cancer** | **Correlation Coefficient** | 0,086 | -0,086 | 0,886 | -0,314 | -0,3 | 0,433 | 0,527 | -0,2 | 0,067 | 0,317 | 0,333 | -0,619 |
| **Significance Level P** | 0,8717 | 0,8717 | 0,0188 | 0,5441 | 0,4328 | 0,244 | 0,1173 | 0,5796 | 0,8647 | 0,4064 | 0,4198 | 0,1017 |
| **n** | 6 | 6 | 6 | 6 | 9 | 9 | 10 | 10 | 9 | 9 | 8 | 8 |
| **feces_Indole-3-butyric_lung_cancer** | **Correlation Coefficient** | -0,029 | -0,6 | 0,886 | 0,314 | -0,133 | -0,267 | 0,697 | 0,491 | -0,15 | 0,167 | -0,238 | -0,333 |
| **Significance Level P** | 0,9572 | 0,208 | 0,0188 | 0,5441 | 0,7324 | 0,4879 | 0,0251 | 0,1497 | 0,7001 | 0,6682 | 0,5702 | 0,4198 |
| **n** | 6 | 6 | 6 | 6 | 9 | 9 | 10 | 10 | 9 | 9 | 8 | 8 |
| **feces_Indole-3-carboxaldehyde_lung_cancer** | **Correlation Coefficient** | 0,886 | 0,257 | 0,886 | 0,029 | 0,517 | 0,317 | 0,152 | 0,2 | 0,15 | -0,05 | 0,381 | -0,643 |
| **Significance Level P** | 0,0188 | 0,6228 | 0,0188 | 0,9572 | 0,1544 | 0,4064 | 0,6761 | 0,5796 | 0,7001 | 0,8984 | 0,3518 | 0,0856 |
| **n** | 6 | 6 | 6 | 6 | 9 | 9 | 10 | 10 | 9 | 9 | 8 | 8 |
| **feces_Indole-3-lactic_lung_cancer** | **Correlation Coefficient** | -0,371 | 0,029 | 0,771 | 0,029 | 0,183 | -0,433 | 0,079 | -0,236 | -0,2 | 0,167 | 0,214 | 0,452 |
| **Significance Level P** | 0,4685 | 0,9572 | 0,0724 | 0,9572 | 0,6368 | 0,244 | 0,8287 | 0,5109 | 0,6059 | 0,6682 | 0,6103 | 0,2604 |
| **n** | 6 | 6 | 6 | 6 | 9 | 9 | 10 | 10 | 9 | 9 | 8 | 8 |
| **feces_Indole-3-propionic_lung_cancer** | **Correlation Coefficient** | 0,086 | -0,543 | 0,314 | -0,429 | -0,133 | -0,367 | -0,079 | 0,042 | 0 | 0,183 | -0,833 | 0,667 |
| **Significance Level P** | 0,8717 | 0,2657 | 0,5441 | 0,3965 | 0,7324 | 0,3317 | 0,8287 | 0,9074 | 1 | 0,6368 | 0,0102 | 0,071 |
| **n** | 6 | 6 | 6 | 6 | 9 | 9 | 10 | 10 | 9 | 9 | 8 | 8 |
| **feces_Kynurenine_lung_cancer** | **Correlation Coefficient** | -0,029 | -0,086 | -0,314 | -0,943 | -0,033 | -0,033 | -0,2 | -0,285 | -0,533 | 0,1 | 0,19 | -0,714 |
| **Significance Level P** | 0,9572 | 0,8717 | 0,5441 | 0,0048 | 0,9322 | 0,9322 | 0,5796 | 0,425 | 0,1392 | 0,798 | 0,6514 | 0,0465 |
| **n** | 6 | 6 | 6 | 6 | 9 | 9 | 10 | 10 | 9 | 9 | 8 | 8 |
| **feces_Pentylresorcinol_lung_cancer** | **Correlation Coefficient** | -0,706 | -0,441 | 0,486 | 0,657 | -0,622 | -0,235 | 0,115 | 0,479 | 0,3 | 0,7 | 0,108 | -0,24 |
| **Significance Level P** | 0,1168 | 0,3809 | 0,3287 | 0,1562 | 0,0738 | 0,5422 | 0,7514 | 0,1615 | 0,4328 | 0,0358 | 0,7995 | 0,5678 |
| **n** | 6 | 6 | 6 | 6 | 9 | 9 | 10 | 10 | 9 | 9 | 8 | 8 |
| **feces_Quinolinic_lung_cancer** | **Correlation Coefficient** | 0,429 | -0,143 | 0,371 | -0,486 | 0,367 | 0,117 | 0,491 | -0,273 | -0,05 | 0,4 | -0,286 | -0,69 |
| **Significance Level P** | 0,3965 | 0,7872 | 0,4685 | 0,3287 | 0,3317 | 0,765 | 0,1497 | 0,4458 | 0,8984 | 0,2861 | 0,4927 | 0,058 |
| **n** | 6 | 6 | 6 | 6 | 9 | 9 | 10 | 10 | 9 | 9 | 8 | 8 |
| **feces_Resorcinol_lung_cancer** | **Correlation Coefficient** | -0,371 | -0,657 | 0,486 | 0,657 | -0,4 | -0,3 | 0,564 | 0,515 | 0,217 | 0,7 | -0,381 | 0,524 |
| **Significance Level P** | 0,4685 | 0,1562 | 0,3287 | 0,1562 | 0,2861 | 0,4328 | 0,0897 | 0,1276 | 0,5755 | 0,0358 | 0,3518 | 0,1827 |
| **n** | 6 | 6 | 6 | 6 | 9 | 9 | 10 | 10 | 9 | 9 | 8 | 8 |
|  | **Pentadecylresorcinol** | | | | | | | | | | | | |
| **feces_Antranillic_lung_cancer** | **Correlation Coefficient** | -0,058 | -0,829 | 0,143 | -0,543 | -0,151 | -0,259 | 0,164 | -0,2 | 0,667 | 0,05 | -0,19 | 0,515 |
| **Significance Level P** | 0,9131 | 0,0416 | 0,7872 | 0,2657 | 0,6977 | 0,5003 | 0,6515 | 0,5796 | 0,0499 | 0,8984 | 0,6514 | 0,1915 |
| **n** | 6 | 6 | 6 | 6 | 9 | 9 | 10 | 10 | 9 | 9 | 8 | 8 |
| **feces_Dodecylresorcinol_lung_cancer** | **Correlation Coefficient** | 0,986 | 0,257 | -0,6 | 0,371 | 0,536 | 0,5 | -0,103 | 0,248 | 0,25 | 0,25 | -0,429 | 0,539 |
| **Significance Level P** | 0,0003 | 0,6228 | 0,208 | 0,4685 | 0,1373 | 0,1705 | 0,777 | 0,4888 | 0,5165 | 0,5165 | 0,2894 | 0,1681 |
| **n** | 6 | 6 | 6 | 6 | 9 | 9 | 10 | 10 | 9 | 9 | 8 | 8 |
| **feces_Ethylresorcinol_lung_cancer** | **Correlation Coefficient** | -0,116 | 0,371 | -0,6 | -0,029 | 0,393 | 0,4 | 0,018 | 0,236 | -0,133 | 0,083 | -0,738 | 0,323 |
| **Significance Level P** | 0,8268 | 0,4685 | 0,208 | 0,9572 | 0,295 | 0,2861 | 0,9602 | 0,5109 | 0,7324 | 0,8312 | 0,0366 | 0,4346 |
| **n** | 6 | 6 | 6 | 6 | 9 | 9 | 10 | 10 | 9 | 9 | 8 | 8 |
| **feces_HIAA_lung_cancer** | **Correlation Coefficient** | -0,522 | -0,029 | 0,943 | -0,829 | -0,231 | -0,067 | 0,588 | -0,661 | 0,267 | 0,367 | -0,381 | 0,036 |
| **Significance Level P** | 0,2883 | 0,9572 | 0,0048 | 0,0416 | 0,5497 | 0,8641 | 0,0739 | 0,0376 | 0,4879 | 0,3317 | 0,3518 | 0,9327 |
| **n** | 6 | 6 | 6 | 6 | 9 | 9 | 10 | 10 | 9 | 9 | 8 | 8 |
| **feces_Indole-3-acetic_lung_cancer** | **Correlation Coefficient** | 0,493 | -0,314 | 0,771 | -0,314 | 0,05 | -0,417 | 0,721 | -0,03 | 0,333 | 0,3 | -0,024 | 0,036 |
| **Significance Level P** | 0,3206 | 0,5441 | 0,0724 | 0,5441 | 0,8979 | 0,2646 | 0,0186 | 0,9338 | 0,3807 | 0,4328 | 0,9554 | 0,9327 |
| **n** | 6 | 6 | 6 | 6 | 9 | 9 | 10 | 10 | 9 | 9 | 8 | 8 |
| **feces_Indole-3-propionic_lung_cancer** | **Correlation Coefficient** | -0,609 | -0,486 | 0,829 | -0,771 | -0,586 | -0,35 | 0,77 | -0,515 | 0,317 | 0,75 | -0,524 | 0,299 |
| **Significance Level P** | 0,1997 | 0,3287 | 0,0416 | 0,0724 | 0,0974 | 0,3558 | 0,0092 | 0,1276 | 0,4064 | 0,0199 | 0,1827 | 0,4713 |
| **n** | 6 | 6 | 6 | 6 | 9 | 9 | 10 | 10 | 9 | 9 | 8 | 8 |
| **feces_Kynurenine_lung_cancer** | **Correlation Coefficient** | -0,116 | -0,714 | 0,771 | -0,543 | -0,276 | -0,383 | 0,903 | -0,394 | 0,383 | 0,333 | 0,214 | -0,371 |
| **Significance Level P** | 0,8268 | 0,1108 | 0,0724 | 0,2657 | 0,472 | 0,3085 | 0,0003 | 0,26 | 0,3085 | 0,3807 | 0,6103 | 0,3652 |
| **n** | 6 | 6 | 6 | 6 | 9 | 9 | 10 | 10 | 9 | 9 | 8 | 8 |
| **feces_Pentylresorcinol_lung_cancer** | **Correlation Coefficient** | -0,358 | -0,265 | -0,257 | 0,143 | -0,802 | 0,067 | -0,333 | -0,006 | 0,433 | 0,217 | -0,347 | -0,03 |
| **Significance Level P** | 0,4856 | 0,6121 | 0,6228 | 0,7872 | 0,0094 | 0,8636 | 0,3466 | 0,9867 | 0,244 | 0,5755 | 0,3993 | 0,9436 |
| **n** | 6 | 6 | 6 | 6 | 9 | 9 | 10 | 10 | 9 | 9 | 8 | 8 |
| **feces_Propylresorcinol_lung_cancer** | **Correlation Coefficient** | 0,522 | 0,714 | -0,486 | 0,6 | 0,05 | 0,733 | -0,733 | 0,588 | 0,533 | 0,15 | -0,071 | 0,575 |
| **Significance Level P** | 0,2883 | 0,1108 | 0,3287 | 0,208 | 0,8979 | 0,0246 | 0,0158 | 0,0739 | 0,1392 | 0,7001 | 0,8665 | 0,1361 |
| **n** | 6 | 6 | 6 | 6 | 9 | 9 | 10 | 10 | 9 | 9 | 8 | 8 |
| **feces_Quinolinic_lung_cancer** | **Correlation Coefficient** | -0,203 | 0,257 | 0,771 | -0,314 | -0,042 | 0,333 | -0,042 | -0,139 | 0,15 | 0,483 | 0,31 | -0,06 |
| **Significance Level P** | 0,6998 | 0,6228 | 0,0724 | 0,5441 | 0,9149 | 0,3807 | 0,9074 | 0,7009 | 0,7001 | 0,1875 | 0,4556 | 0,888 |
| **n** | 6 | 6 | 6 | 6 | 9 | 9 | 10 | 10 | 9 | 9 | 8 | 8 |
| **feces_Resorcinol_lung_cancer** | **Correlation Coefficient** | -0,609 | -0,257 | -0,257 | 0,143 | -0,653 | 0,25 | -0,358 | 0,321 | 0,267 | 0,017 | -0,048 | 0,587 |
| **Significance Level P** | 0,1997 | 0,6228 | 0,6228 | 0,7872 | 0,0567 | 0,5165 | 0,3104 | 0,3655 | 0,4879 | 0,9661 | 0,9108 | 0,1262 |
| **n** | 6 | 6 | 6 | 6 | 9 | 9 | 10 | 10 | 9 | 9 | 8 | 8 |
| **feces_Tryptophan_lung_cancer** | **Correlation Coefficient** | -0,232 | 0,657 | 0,886 | -0,486 | -0,385 | -0,15 | 0,685 | -0,612 | 0,083 | 0,55 | 0,071 | -0,599 |
| **Significance Level P** | 0,6584 | 0,1562 | 0,0188 | 0,3287 | 0,3063 | 0,7001 | 0,0289 | 0,06 | 0,8312 | 0,125 | 0,8665 | 0,1168 |
| **n** | 6 | 6 | 6 | 6 | 9 | 9 | 10 | 10 | 9 | 9 | 8 | 8 |
| **feces_Xanturenic acid_lung_cancer** | **Correlation Coefficient** | 0,058 | -0,029 | 0,714 | -0,314 | 0,285 | -0,067 | 0,067 | -0,285 | 0,717 | -0,233 | 0,262 | -0,036 |
| **Significance Level P** | 0,9131 | 0,9572 | 0,1108 | 0,5441 | 0,4581 | 0,8647 | 0,8548 | 0,425 | 0,0298 | 0,5457 | 0,5309 | 0,9327 |
| **n** | 6 | 6 | 6 | 6 | 9 | 9 | 10 | 10 | 9 | 9 | 8 | 8 |
