# Supplementary material for: Alkylresorcinols as a New Type of Gut Microbiota Regulators Influencing Immune Therapy Efficiency in Lung Cancer Treatment
Source: Hindawi journal article supplement (doi:10.1155/2023/2333767), 2023-12-23
Supplement: f1 [file 2333767.f1.zip › Supplementary Table 2.docx]

| Plasma AR concentration (nmol/l) |  | Healthy | Negative | | Positive | | Stable | | Non-negative | |
| --- | --- | --- | --- | --- | --- | --- | --- | --- | --- | --- |
| Before | After | Before | After | Before | After | Before | After |
| **C0** | Median | 2,01 | 1,91 | 1,56 | 2,34* ** | 1,64 | 1,83 | 1,99 | 2,07* | 1,8 |
| 25%-75% | 1,6750 to 2,5800 | 1,6450 to 2,2250 | 1,2775 to 3,0725 | 2,0700 to 2,8200 | 1,3700 to 2,4300 |  |  | 1,8600 to 2,4900 | 1,5050 to 2,1450 |
| **C1** | Median | 1,455 | 1,19 | 2,38 | 1,75 | 1,185 | 1,01 | 2,55 | 1,13 | 1,28 |
| 25%-75% | 0,9550 to 2,0100 | 0,8125 to 2,8100 | 1,5475 to 4,9100 | 1,1000 to 2,4900 | 1,0700 to 1,2800 |  |  | 0,9750 to 2,0250 | 1,0675 to 2,8625 |
| **C2** | Median | 3,23 | 2,07 | 3,52 # | 3,825 | 2,89 | 2,47 | 3,25 | 3,79 | 3,25 |
| 25%-75% | 2,2900 to 4,7700 | 1,6200 to 3,9650 | 3,1100 to 7,4200 | 1,7000 to 4,0100 | 2,1900 to 3,3900 |  |  | 1,9925 to 4,3850 | 2,4150 to 4,0150 |
| **C3** | Median | 1,145 | 0,98 | 1,32 | 0,995 | 1,91 | 1,66 | 1,27 | 1,5 | 1,9 |
| 25%-75% | 0,8400 to 1,6900 | 0,8150 to 1,9550 | 0,7850 to 2,1500 | 0,4500 to 2,4200 | 1,0500 to 2,6000 |  |  | 0,4800 to 1,8575 | 1,1550 to 2,5475 |
| **C5** | Median | 0,15 | 0,13 | 0,11 | 0,16 | 0,23 # * | 0,21 | 0,12 | 0,17 | 0,2 |
| 25%-75% | 0,08000 to 0,2200 | 0,1075 to 0,1975 | 0,09250 to 0,1750 | 0,04000 to 0,1900 | 0,1800 to 0,2700 |  |  | 0,1000 to 0,2175 | 0,1650 to 0,2550 |
| **C6** | Median | 0,76 | 1,29 | 2,34 | 0,975 | 0,975 | 1,45 * | 0,6 | 1,24 | 0,69 |
| 25%-75% | 0,4200 to 1,0800 | 0,5225 to 1,1050 | 0,6800 to 1,3775 | 0,2500 to 1,5300 | 0,6200 to 1,6100 |  |  | 0,5950 to 1,5775 | 0,5700 to 1,3475 |
| **C12** | Median | 1,37 | 1,73 | 1,71 | 1,455 | 1,73 | 2,03 | 1,47 | 1,79 | 1,71 |
| 25%-75% | 0,9900 to 2,0100 | 1,4000 to 2,1150 | 0,9550 to 2,4325 | 1,0000 to 2,0100 | 1,2400 to 2,0700 |  |  | 1,0900 to 2,0900 | 1,1625 to 2,2350 |
| **C15** | Median | 0,201 | 0,56 | 0,7 | 0,38* ** | 0,66 # | 0,72 | 0,49* | 0,57 | 0,39 |
| 25%-75% | 0,3500 to 0,7150 | 0,4775 to 0,6550 | 0,4800 to 0,7750 | 0,1100 to 0,3900 | 0,5700 to 0,8500 |  |  | 0,4875 to 0,7450 | 0,3125 to 0,6900 |
| Note. |  |  |  |  |  |  |  |  |  |  |
| * - statistically significant differences compared to the group with negative dynamics |  |  |  |  |  |  |  |  |  |  |
| ** - statistically significant differences compared to group with stable process |  |  |  |  |  |  |  |  |  |  |
| # - statistically significant differences before and after therapy |  |  |  |  |  |  |  |  |  |  |
